# Supplementary material for: Structural control in self-standing mesostructured silica oriented membranes and xerogelsElectronic supplementary information (ESI) available: TEM and indexation of cubic Im3m hybrid mesophase, comparison of the synthesis conditions. See http://www.rsc.org/suppdata/cc/b2/b207595d/
Source: Royal Society of Chemistry journal article supplement (doi:10.1039/b207595d), 2002-09-19
Supplement: b207595d-f2.doc [file b207595d-f2.doc]

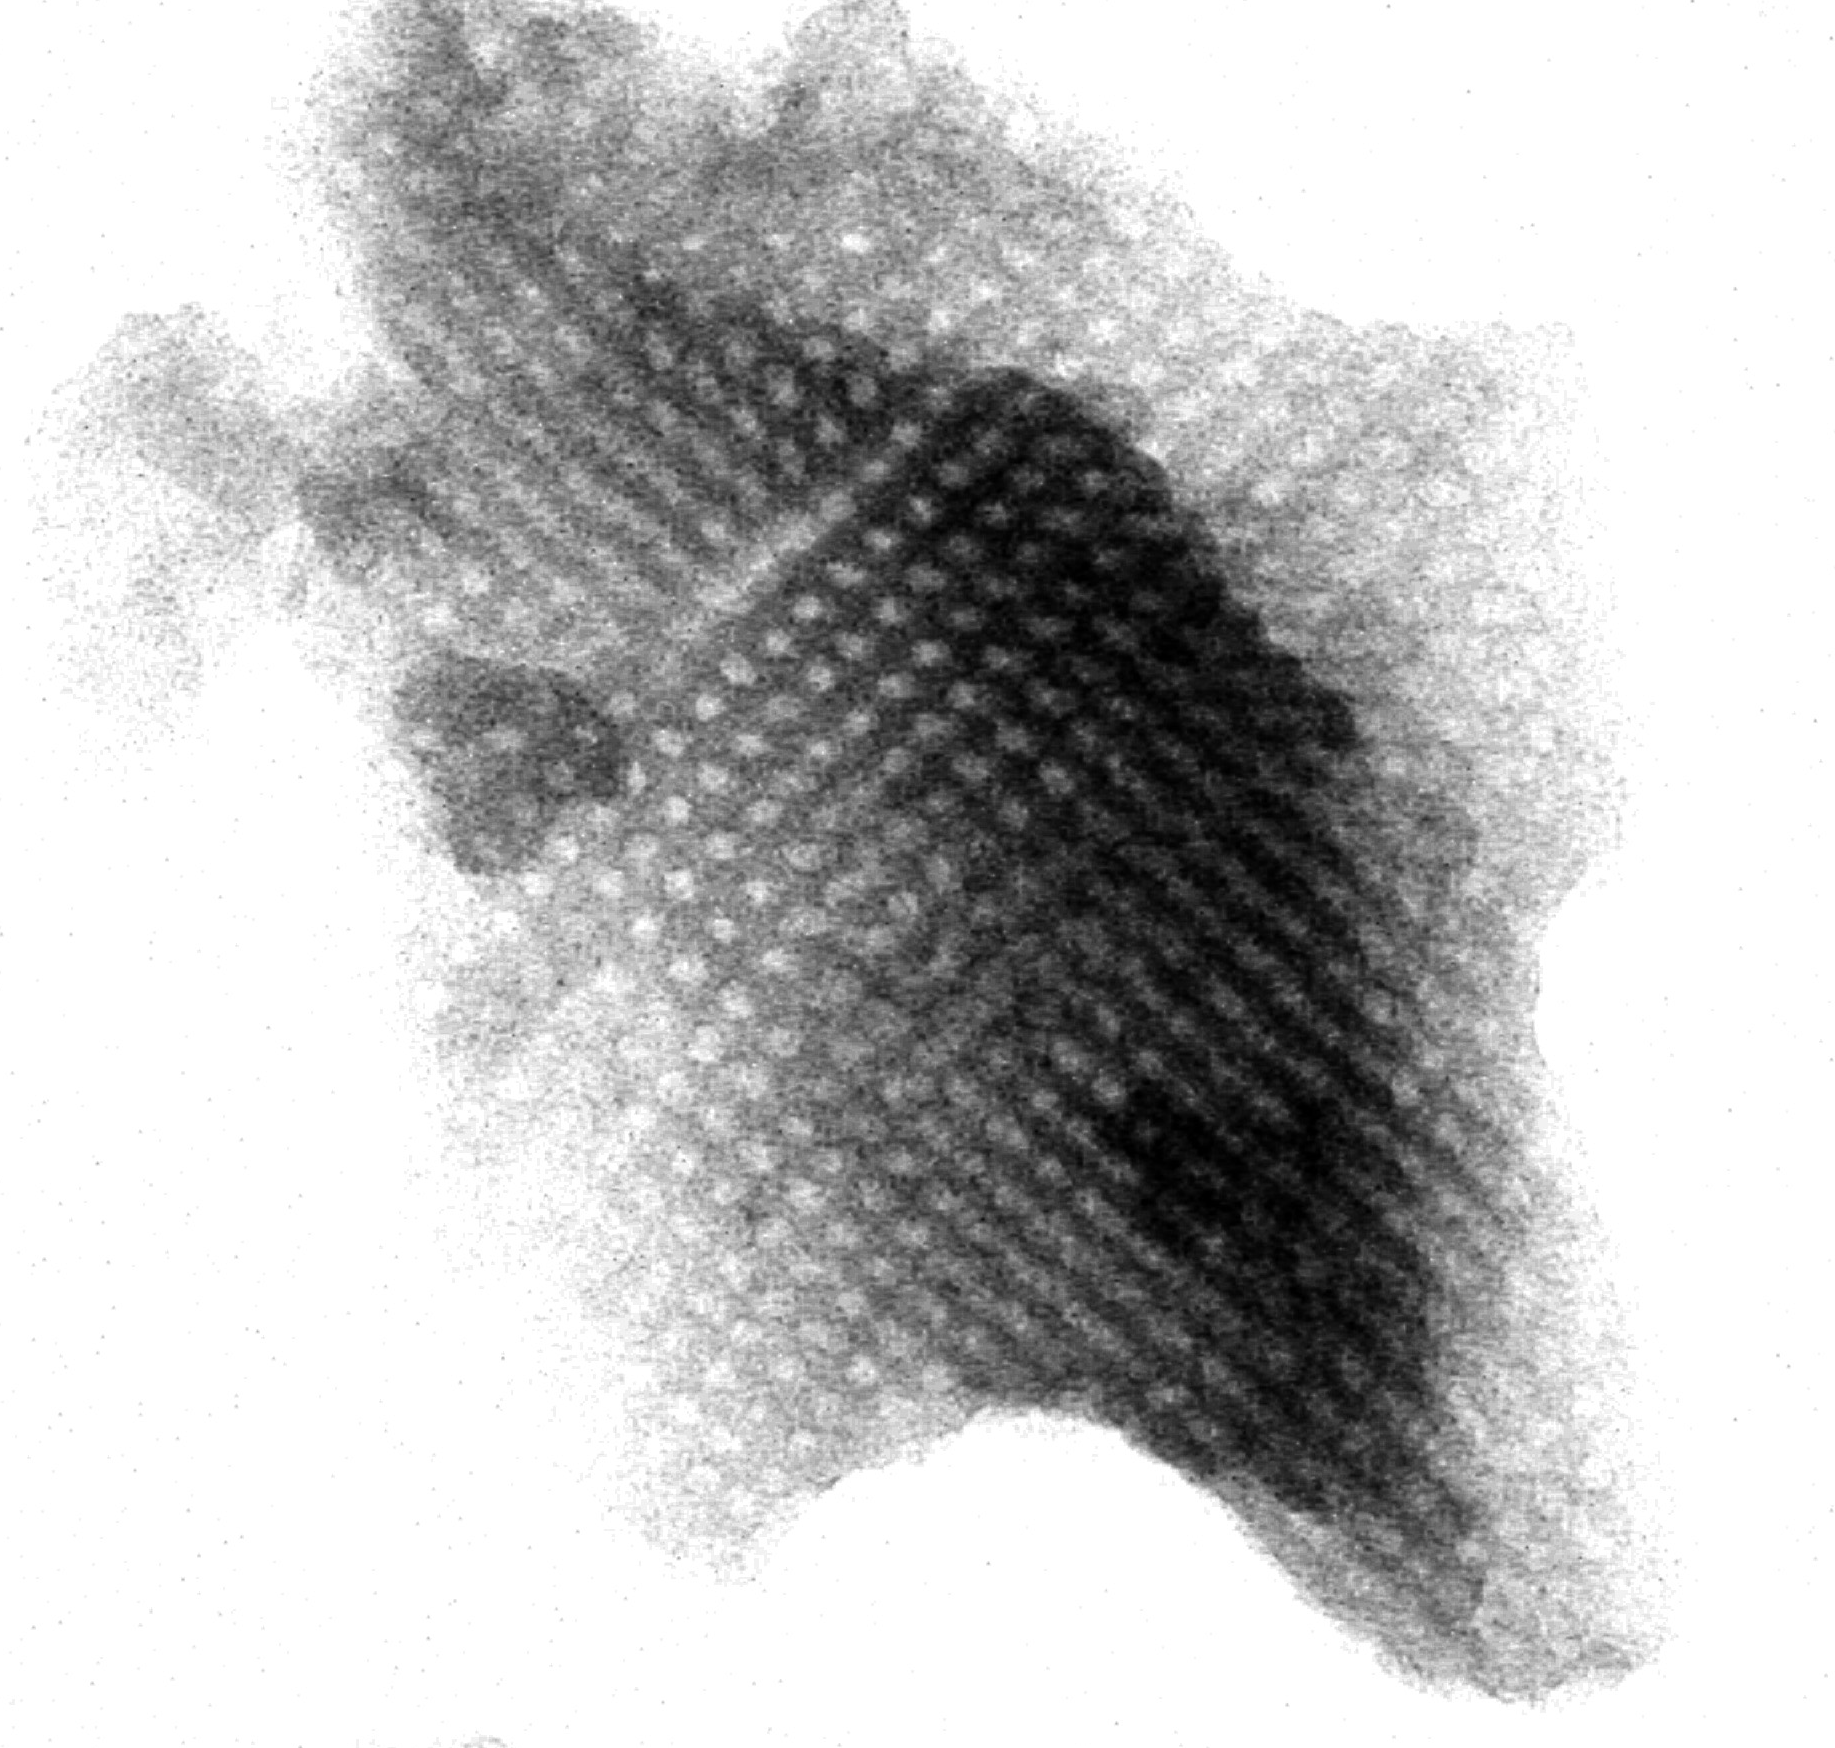

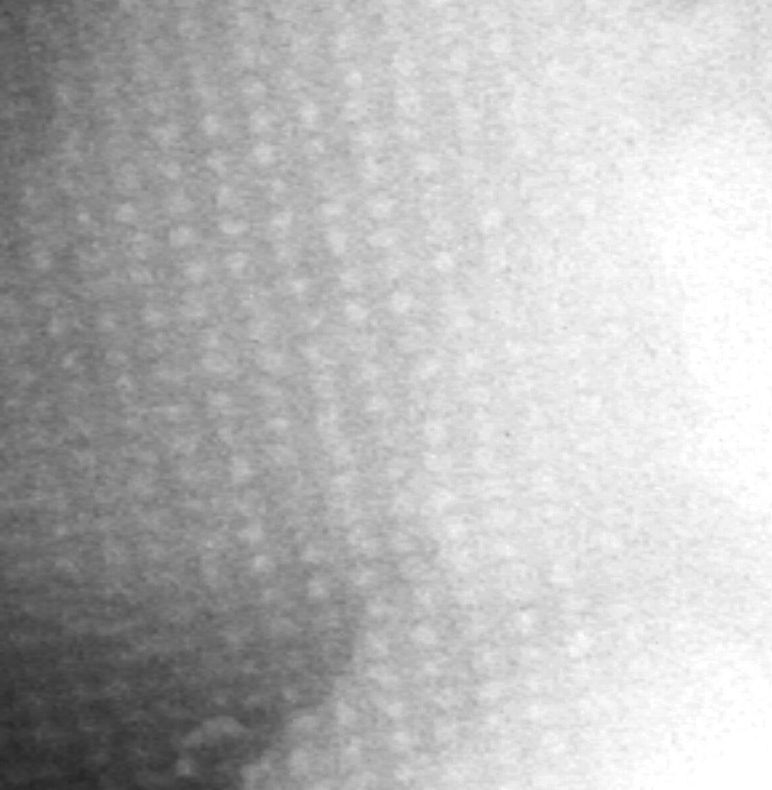

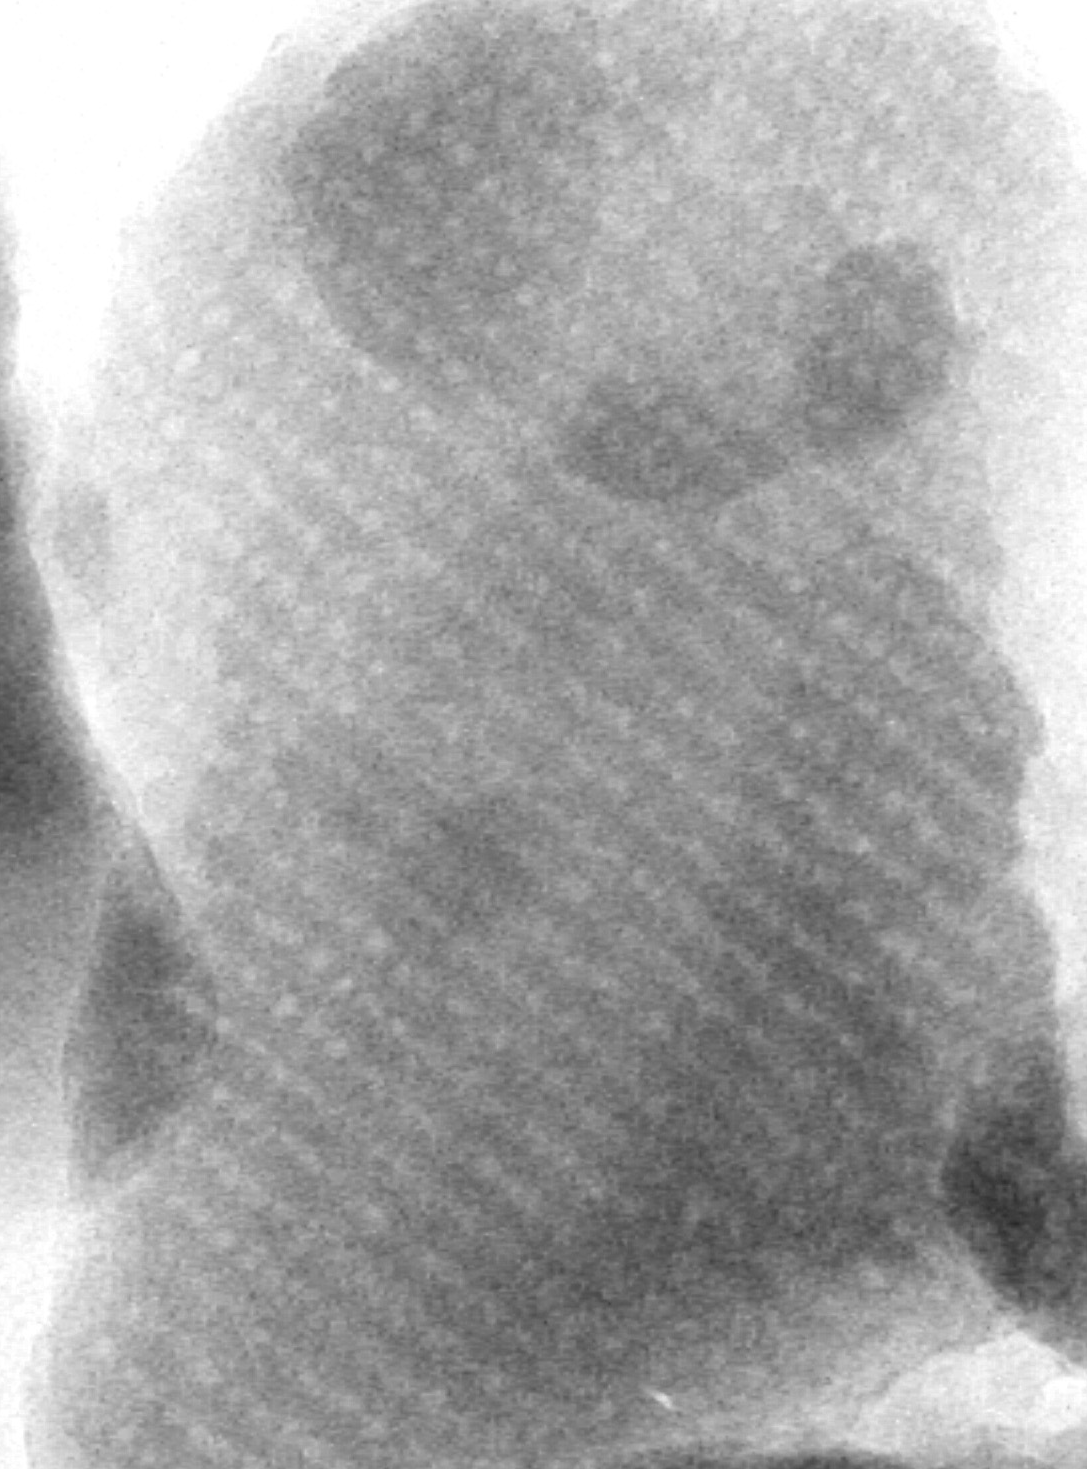
**Supplementary Figure 2 –** TEM images showing different orientations of the cubic pore system in an F127-silica hybrid, F-50-5. Measurement bars represent 75 nm (left, centre), and 100 nm (right).

Perp to 100

Perp to 110

Perpendicular to 111
