# Supplementary material for: Structural control in self-standing mesostructured silica oriented membranes and xerogelsElectronic supplementary information (ESI) available: TEM and indexation of cubic Im3m hybrid mesophase, comparison of the synthesis conditions. See http://www.rsc.org/suppdata/cc/b2/b207595d/
Source: Royal Society of Chemistry journal article supplement (doi:10.1039/b207595d), 2002-09-19
Supplement: b207595d-f3.doc [file b207595d-f3.doc]

200

020

110

***a****

***b****

0-20

-200

-1-10

***c****

-110

1-10

**A**

**B**

**a**

**b**

**c**

***n***


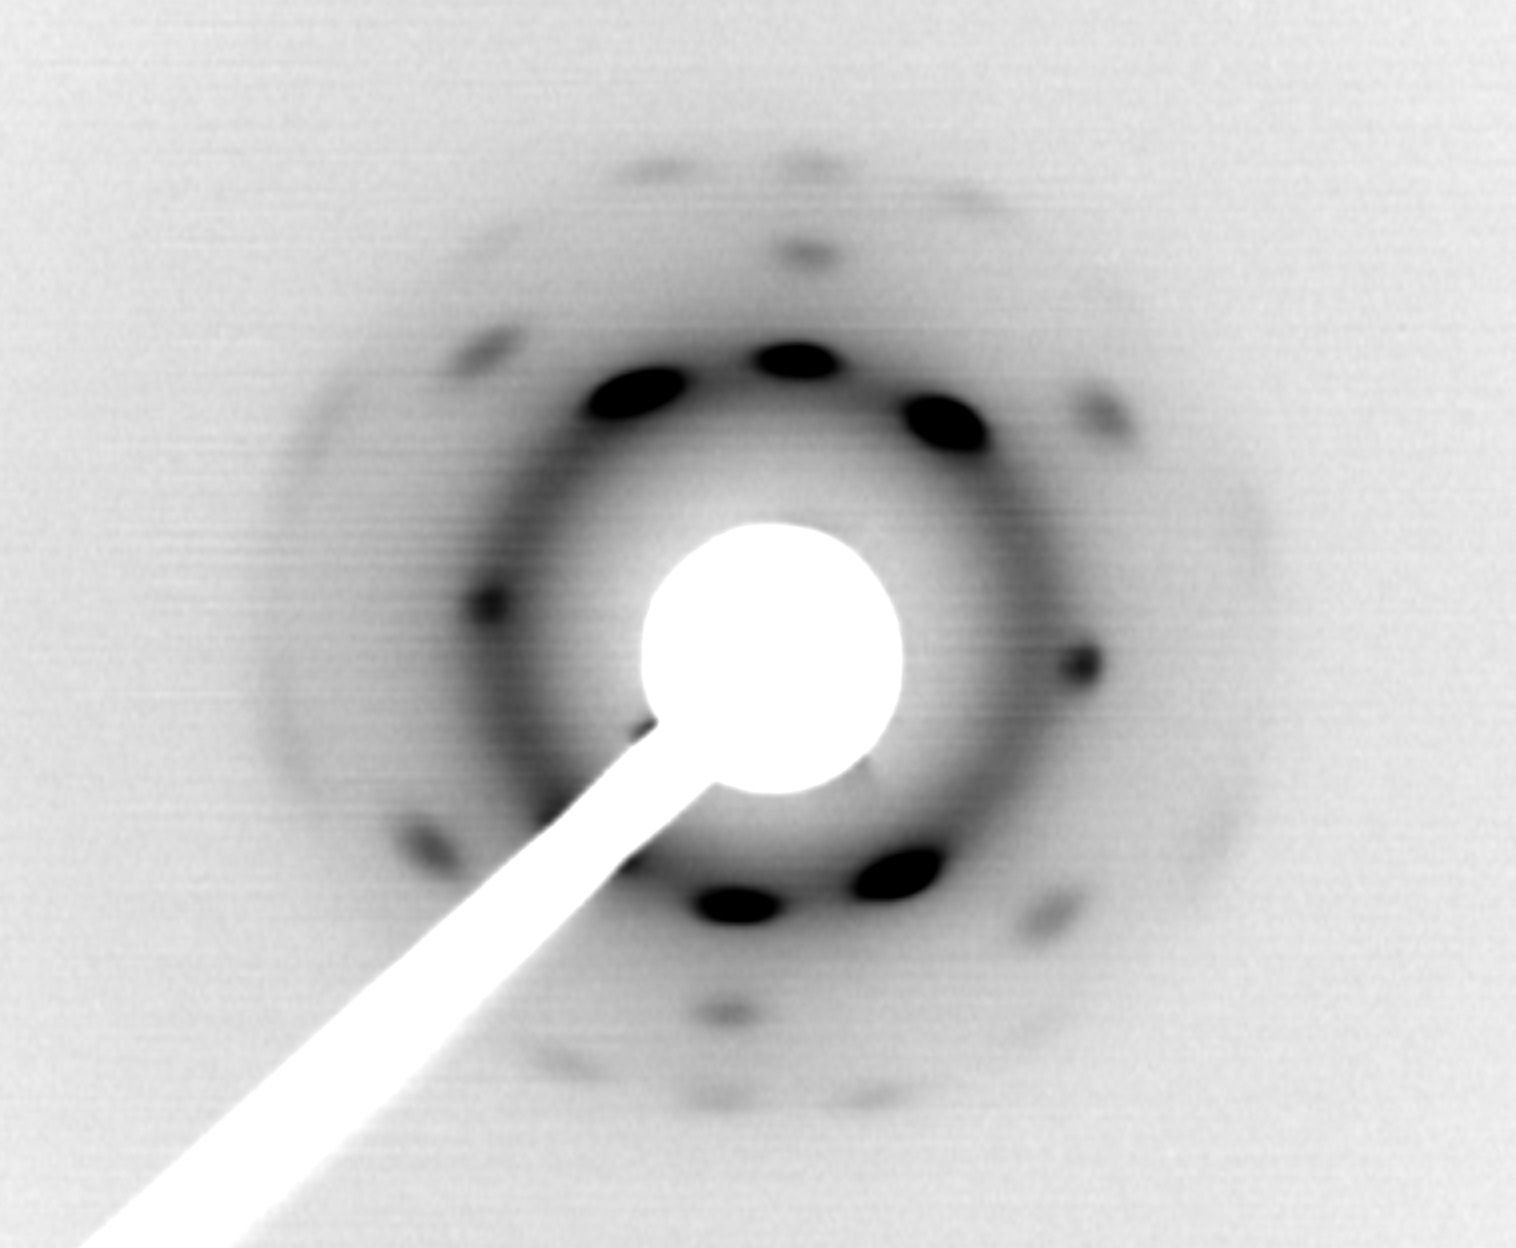

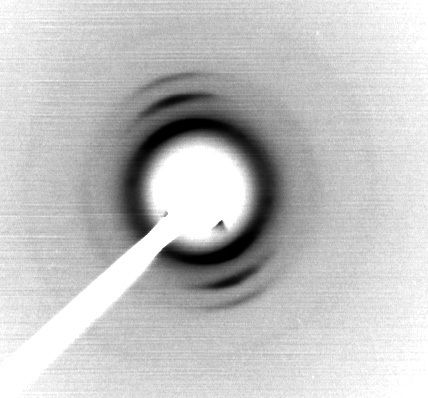


{110}

{200}

{211}

**90° incidence**

**110**

**Film Plane**

**XRD in**

**Grazing Incidence**

**-1-10**

**200**

**020**

**011**

**01-1**

**101**

**10-1**

**112**

**11-2**

**211**

**21-1**

**121**

**12-1**

**-110**

**1-10**

**0-1-1**

**0-11**

**-10-1**

**-101**

**-12-1 -121**

**2-1-1 2-11**

**002**

**00-2**

**1-1-2 -112**

**-11-2 1-12**

**-200**

**0-20**

**-2-1-1**

**-2-11**

**-1-2-1**

**-1-21**

**-1-1-2**

**-1-12**

**1-21 1-2-1**

**-211 -21-1**

**C**

**Supplementary Figure 3:** Top: Schematic representation of (A) cubic domains (represented by the **c** vector) with **c****n** and absence of in-plane orientation (**n** is normal to the flat surfaces of the hybrid). (B) scheme of the reciprocal space, showing the (200) and some of the (110) planes as an example. As a result of the rotation of the **c** axis, some of these planes are polyoriented; in the reciprocal space, this is translated as concentric circles. The result of the intersection of the Ewald sphere and these circles in grazing incidence is the pattern observed in C. (C) Indexed 2D XRD of an F-35-5 hybrid. The non-indexed spots correspond to the other half of the circles shown in (A). Inset: normal incidence, showing diffraction rings; the intensity reinforcement is due to a slight misalignment in this particular sample.
