# Supplementary material for: Structural control in self-standing mesostructured silica oriented membranes and xerogelsElectronic supplementary information (ESI) available: TEM and indexation of cubic Im3m hybrid mesophase, comparison of the synthesis conditions. See http://www.rsc.org/suppdata/cc/b2/b207595d/
Source: Royal Society of Chemistry journal article supplement (doi:10.1039/b207595d), 2002-09-19
Supplement: b207595d-f4.doc [file b207595d-f4.doc]

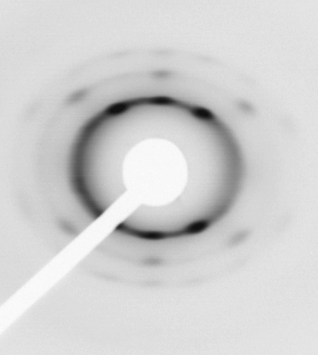

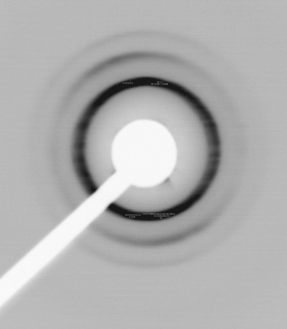


{110}

{200}

{211}

**90° incidence**

**Grazing Incidence**


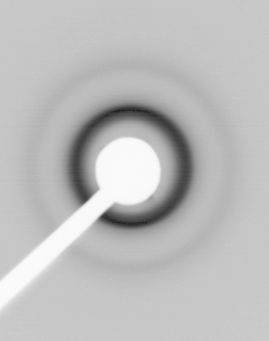

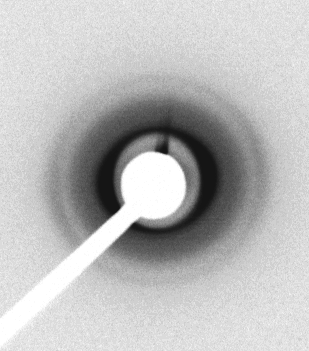

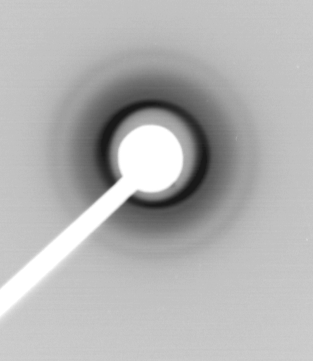

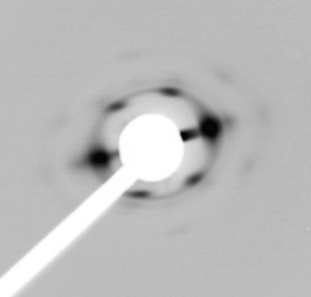


{10}

{20}

{10}

{20}

{11}

h=1

h=3

h=5

**Supplementary Figure 4.** 2D-XRD of silica/F127 hybrids obtained at a *VTS%* = 50%. Low water conditions give rise to non-oriented phases (worm-like or nonoriented hexagonal, see ref. 12). For higher water contents, hexagonal and then cubic phases are obtained. The homogeneous scattering at normal incidence geometry reflects the absence of in-plane orientation of the diffraction entities (channels for the *P6m*, c axis for the *Im3m*). Sharp spots are observed for samples with *h*>3. For the h=5 sample, the absence of the out-of-plane spots and the eccentricity are due to the incidence at 5-10°.

**Supplementary Table 1.**  Obtained phases under low air flux, F127 template, RH 50%

|  | *VTS%* | | | |
| --- | --- | --- | --- | --- |
| *h*  N: non-organised  WL wormlike or disordered  H *P6m*  C *Im3m*  (H) segregation (hexagonal) | 26 | 35 | 50 | 56 |
| 1 | N | WL | WL |  |
| 3 | N | H | H | H(C) |
| 5 | N | C | C | C |
| 5 | N | C | C(H) | C(H) |

**Supplementary Table 2.**  Obtained phases under different conditions, *h* = 5

| A: Low air flux, 50%RH  B: Low air flux, 30%RH  C: oven, 40°C  D: oven, 60°C  Q: quiescent conditions, 50%RH | *VTS%* | | | | |
| --- | --- | --- | --- | --- | --- |
| *Template (VTS%)* | A | B | C | D | Q |
| F(35) | C | N | N | C | C |
| F(50) | C | C | C | C | WL(H) |
| P(35) | N | N | N | N | N |
| P(50) | H | H | WL | H (Lam) | H |
